# Supplementary material for: Obesity and dyslipidemia are associated with partially reversible modifications to DNA hydroxymethylation of apoptosis- and senescence-related genes in swine adipose-derived mesenchymal stem/stromal cells
Source: PubMed Central journal article supplement (PMC10214739; doi:10.1186/s13287-023-03372-x), 2023-05-25
Supplement: 13287_2023_3372_MOESM1_ESM.pdf [file 13287_2023_3372_MOESM1_ESM.pdf]

## SUPPLEMENTAL MATERIAL

**“Obesity and dyslipidemia are associated with partially reversible modifications to DNA hydroxymethylation of apoptosis- and senescence-related genes in swine adipose-derived mesenchymal stem/stromal cells”**

Logan M. Glasstetter<sup>1</sup>, Tomiwa S. Oderinde<sup>1</sup>, Mohit Mirchandani<sup>1</sup>, Kamalnath Sankaran Rajagopalan<sup>1</sup>, Samer H. Barsom<sup>1</sup>, Roman Thaler<sup>2</sup>, Sarosh Siddiqi<sup>1</sup>, Xiang-Yang Zhu<sup>1</sup>, Hui Tang<sup>1</sup>, Kyra L. Jordan<sup>1</sup>, Ishran M. Saadiq<sup>1</sup>, Andre J. van Wijnen<sup>3</sup>, Alfonso Eirin<sup>1</sup>, Lilach O. Lerman<sup>1</sup>

<sup>1</sup>Division of Nephrology and Hypertension, Mayo Clinic, Rochester, MN, USA.

<sup>2</sup>Department of Orthopedic Surgery, Mayo Clinic, Rochester, MN, USA.

<sup>3</sup>Department of Biochemistry, University of Vermont, Burlington, VT, USA.

### **Corresponding Author:**

Lilach O. Lerman, MD, PhD, Division of Nephrology and Hypertension, Mayo Clinic, 200 First Street SW, Rochester, MN, 55905. ([lerman.lilach@mayo.edu](mailto:lerman.lilach@mayo.edu))

Phone: (507)-266-9376, Fax: (507)-266-9316

## Supplemental Tables

**Table S1.** DAVID Functional Annotation Chart (GOTERM\_BP\_DIRECT) computed for genes with a multiplicity\* of at least 2 in the 95 gene sets with high 5hmC/high mRNA levels identified in an integrative analysis of swine Obese- versus Lean-MSCs.†

| Term                                                                            | Count | %     | P-Value  | Bonferroni | Benjamini | FDR      |
|---------------------------------------------------------------------------------|-------|-------|----------|------------|-----------|----------|
| GO:0060337~type I interferon signaling pathway                                  | 66    | 2.49  | 4.26E-53 | 3.33E-49   | 3.33E-49  | 3.06E-49 |
| GO:0019221~cytokine-mediated signaling pathway                                  | 145   | 5.46  | 1.93E-45 | 1.51E-41   | 7.54E-42  | 6.94E-42 |
| GO:0045944~positive regulation of transcription from RNA polymerase II promoter | 311   | 11.72 | 3.09E-36 | 2.41E-32   | 8.05E-33  | 7.41E-33 |
| GO:0006954~inflammatory response                                                | 150   | 5.65  | 2.01E-35 | 1.57E-31   | 3.93E-32  | 3.62E-32 |
| GO:0006915~apoptotic process                                                    | 188   | 7.08  | 1.89E-34 | 1.48E-30   | 2.96E-31  | 2.73E-31 |
| GO:0001666~response to hypoxia                                                  | 88    | 3.32  | 1.17E-30 | 9.12E-27   | 1.38E-27  | 1.27E-27 |
| GO:0043066~negative regulation of apoptotic process                             | 170   | 6.41  | 1.23E-30 | 9.64E-27   | 1.38E-27  | 1.27E-27 |
| GO:0010628~positive regulation of gene expression                               | 163   | 6.14  | 7.33E-29 | 5.73E-25   | 7.16E-26  | 6.60E-26 |
| GO:0043065~positive regulation of apoptotic process                             | 131   | 4.94  | 1.61E-27 | 1.26E-23   | 1.40E-24  | 1.29E-24 |
| GO:0043123~positive regulation of I-kappaB kinase/NF-kappaB signaling           | 85    | 3.20  | 1.73E-26 | 1.35E-22   | 1.35E-23  | 1.25E-23 |
| GO:0006687~glycosphingolipid metabolic process                                  | 36    | 1.36  | 2.15E-26 | 1.68E-22   | 1.53E-23  | 1.41E-23 |
| GO:0007165~signal transduction                                                  | 285   | 10.74 | 4.74E-26 | 3.70E-22   | 3.09E-23  | 2.84E-23 |
| GO:0043312~neutrophil degranulation                                             | 149   | 5.61  | 2.32E-25 | 1.81E-21   | 1.40E-22  | 1.29E-22 |
| GO:0008285~negative regulation of cell proliferation                            | 142   | 5.35  | 1.93E-24 | 1.51E-20   | 1.08E-21  | 9.94E-22 |
| GO:0071260~cellular response to mechanical stimulus                             | 51    | 1.92  | 4.09E-24 | 3.20E-20   | 2.13E-21  | 1.96E-21 |
| GO:0042493~response to drug                                                     | 104   | 3.92  | 8.02E-24 | 6.27E-20   | 3.92E-21  | 3.61E-21 |
| GO:0000187~activation of MAPK activity                                          | 60    | 2.26  | 2.92E-22 | 2.28E-18   | 1.34E-19  | 1.24E-19 |

|                                                                |     |      |          |          |          |          |
|----------------------------------------------------------------|-----|------|----------|----------|----------|----------|
| GO:0045893~positive regulation of transcription, DNA-templated | 178 | 6.71 | 3.77E-22 | 2.94E-18 | 1.64E-19 | 1.51E-19 |
| GO:0001934~positive regulation of protein phosphorylation      | 82  | 3.09 | 5.92E-22 | 4.63E-18 | 2.44E-19 | 2.24E-19 |
| GO:0071222~cellular response to lipopolysaccharide             | 78  | 2.94 | 9.83E-22 | 7.68E-18 | 3.84E-19 | 3.54E-19 |
| GO:0001525~angiogenesis                                        | 91  | 3.43 | 2.18E-21 | 1.70E-17 | 8.10E-19 | 7.46E-19 |
| GO:0008284~positive regulation of cell proliferation           | 151 | 5.69 | 3.29E-21 | 2.57E-17 | 1.17E-18 | 1.08E-18 |
| GO:0051607~defense response to virus                           | 84  | 3.17 | 1.18E-20 | 9.24E-17 | 4.02E-18 | 3.70E-18 |
| GO:0071456~cellular response to hypoxia                        | 61  | 2.30 | 1.28E-20 | 1.00E-16 | 4.18E-18 | 3.85E-18 |
| GO:0030335~positive regulation of cell migration               | 92  | 3.47 | 1.66E-20 | 1.30E-16 | 5.19E-18 | 4.78E-18 |

\*This multiplicity requirement is invoked to adjust the size of a composite list of genes (from 95 gene-sets) to a number that is viable for the overlap analysis, while prioritizing the most important genes.

†Salient Gene Ontology (GO) terms with functions related to apoptotic process, cell proliferation, defense response, or cytokine-mediated signaling are highlighted.

**Table S2.** DAVID Functional Annotation Chart (GOTERM\_BP\_DIRECT) computed for genes with a multiplicity of at least 3 in the 95 gene sets with high 5hmC/high mRNA levels identified in an integrative analysis of swine Obese- versus Lean-MSCs.

| Term                                                                            | Count | %     | P-Value  | Bonferroni | Benjamini | FDR      |
|---------------------------------------------------------------------------------|-------|-------|----------|------------|-----------|----------|
| GO:0060337~type I interferon signaling pathway                                  | 56    | 5.31  | 1.62E-57 | 9.06E-54   | 9.06E-54  | 8.24E-54 |
| GO:0019221~cytokine-mediated signaling pathway                                  | 99    | 9.39  | 1.25E-47 | 7.01E-44   | 3.50E-44  | 3.19E-44 |
| GO:0006954~inflammatory response                                                | 92    | 8.73  | 5.37E-33 | 3.00E-29   | 1.00E-29  | 9.11E-30 |
| GO:0006915~apoptotic process                                                    | 108   | 10.25 | 2.84E-30 | 1.59E-26   | 3.97E-27  | 3.62E-27 |
| GO:0061621~canonical glycolysis                                                 | 24    | 2.28  | 9.06E-29 | 5.07E-25   | 1.01E-25  | 9.22E-26 |
| GO:0043066~negative regulation of apoptotic process                             | 100   | 9.49  | 1.54E-28 | 8.63E-25   | 1.44E-25  | 1.31E-25 |
| GO:0001666~response to hypoxia                                                  | 57    | 5.41  | 6.15E-28 | 3.44E-24   | 4.91E-25  | 4.47E-25 |
| GO:0045944~positive regulation of transcription from RNA polymerase II promoter | 157   | 14.90 | 1.82E-26 | 1.02E-22   | 1.27E-23  | 1.16E-23 |
| GO:0009615~response to virus                                                    | 43    | 4.08  | 9.46E-25 | 5.29E-21   | 5.88E-22  | 5.35E-22 |
| GO:0071222~cellular response to lipopolysaccharide                              | 54    | 5.12  | 3.02E-24 | 1.69E-20   | 1.69E-21  | 1.53E-21 |
| GO:0042493~response to drug                                                     | 66    | 6.26  | 5.21E-24 | 2.91E-20   | 2.65E-21  | 2.41E-21 |
| GO:0043065~positive regulation of apoptotic process                             | 76    | 7.21  | 1.20E-23 | 6.74E-20   | 5.61E-21  | 5.11E-21 |
| GO:0051607~defense response to virus                                            | 57    | 5.41  | 3.40E-23 | 1.90E-19   | 1.46E-20  | 1.33E-20 |
| GO:0010628~positive regulation of gene expression                               | 89    | 8.44  | 8.38E-23 | 4.69E-19   | 3.35E-20  | 3.05E-20 |
| GO:0030335~positive regulation of cell migration                                | 60    | 5.69  | 4.76E-22 | 2.66E-18   | 1.77E-19  | 1.61E-19 |
| GO:0008285~negative regulation of cell proliferation                            | 81    | 7.69  | 1.51E-21 | 8.46E-18   | 5.29E-19  | 4.81E-19 |
| GO:0006096~glycolytic process                                                   | 25    | 2.37  | 2.34E-21 | 1.31E-17   | 7.69E-19  | 7.00E-19 |
| GO:0071260~cellular response to mechanical stimulus                             | 34    | 3.23  | 5.93E-21 | 3.31E-17   | 1.84E-18  | 1.68E-18 |
| GO:0006687~glycosphingolipid metabolic process                                  | 24    | 2.28  | 1.42E-19 | 7.95E-16   | 4.19E-17  | 3.81E-17 |
| GO:0043312~neutrophil degranulation                                             | 80    | 7.59  | 1.65E-19 | 9.25E-16   | 4.62E-17  | 4.21E-17 |

|                                                                |     |       |          |          |          |          |
|----------------------------------------------------------------|-----|-------|----------|----------|----------|----------|
| GO:0008284~positive regulation of cell proliferation           | 84  | 7.97  | 7.97E-19 | 4.46E-15 | 2.12E-16 | 1.93E-16 |
| GO:0007165~signal transduction                                 | 137 | 13.00 | 1.32E-17 | 7.35E-14 | 3.34E-15 | 3.04E-15 |
| GO:0010832~negative regulation of myotube differentiation      | 15  | 1.42  | 1.92E-17 | 1.07E-13 | 4.66E-15 | 4.24E-15 |
| GO:0045893~positive regulation of transcription, DNA-templated | 92  | 8.73  | 5.80E-17 | 6.21E-13 | 1.35E-14 | 1.23E-14 |
| GO:0071456~cellular response to hypoxia                        | 37  | 3.51  | 8.49E-17 | 6.21E-13 | 1.86E-14 | 1.69E-14 |

**Table S3.** DAVID Functional Annotation Chart (GOTERM\_BP\_DIRECT) computed for genes with a multiplicity of at least 4 in the 95 gene sets with high 5hmC/high mRNA levels identified in an integrative analysis of swine Obese- versus Lean-MSCs.

| Term                                                                            | Count | %     | P-Value  | Bonferroni | Benjamini | FDR      |
|---------------------------------------------------------------------------------|-------|-------|----------|------------|-----------|----------|
| GO:0060337~type I interferon signaling pathway                                  | 32    | 6.81  | 4.21E-32 | 1.66E-28   | 1.66E-28  | 1.50E-28 |
| GO:0019221~cytokine-mediated signaling pathway                                  | 53    | 11.28 | 5.14E-28 | 2.03E-24   | 1.01E-24  | 9.17E-25 |
| GO:0061621~canonical glycolysis                                                 | 20    | 4.26  | 4.71E-27 | 1.86E-23   | 6.19E-24  | 5.60E-24 |
| GO:0006954~inflammatory response                                                | 54    | 11.49 | 3.19E-24 | 1.26E-20   | 3.15E-21  | 2.85E-21 |
| GO:0045944~positive regulation of transcription from RNA polymerase II promoter | 92    | 19.57 | 3.05E-23 | 1.20E-19   | 2.38E-20  | 2.16E-20 |
| GO:0006915~apoptotic process                                                    | 63    | 13.40 | 3.63E-23 | 1.43E-19   | 2.38E-20  | 2.16E-20 |
| GO:0010832~negative regulation of myotube differentiation                       | 15    | 3.19  | 2.67E-22 | 1.05E-18   | 1.50E-19  | 1.36E-19 |
| GO:0043066~negative regulation of apoptotic process                             | 59    | 12.55 | 3.05E-22 | 1.20E-18   | 1.50E-19  | 1.36E-19 |
| GO:0001666~response to hypoxia                                                  | 36    | 7.66  | 8.47E-22 | 3.34E-18   | 3.71E-19  | 3.36E-19 |
| GO:0009615~response to virus                                                    | 29    | 6.17  | 1.04E-20 | 4.09E-17   | 4.09E-18  | 3.70E-18 |
| GO:0008285~negative regulation of cell proliferation                            | 52    | 11.06 | 3.93E-20 | 1.55E-16   | 1.41E-17  | 1.28E-17 |
| GO:0006096~glycolytic process                                                   | 19    | 4.04  | 2.05E-19 | 8.07E-16   | 6.72E-17  | 6.09E-17 |
| GO:0043065~positive regulation of apoptotic process                             | 46    | 9.79  | 5.67E-19 | 2.24E-15   | 1.72E-16  | 1.56E-16 |
| GO:0071222~cellular response to lipopolysaccharide                              | 33    | 7.02  | 3.06E-18 | 1.21E-14   | 8.61E-16  | 7.80E-16 |
| GO:0010628~positive regulation of gene expression                               | 52    | 11.06 | 7.30E-18 | 2.88E-14   | 1.92E-15  | 1.74E-15 |
| GO:0030335~positive regulation of cell migration                                | 36    | 7.66  | 8.90E-17 | 4.38E-13   | 2.19E-14  | 1.99E-14 |
| GO:0045893~positive regulation of transcription, DNA-templated                  | 57    | 12.13 | 3.56E-16 | 1.31E-12   | 8.27E-14  | 7.48E-14 |
| GO:0071260~cellular response to mechanical stimulus                             | 22    | 4.68  | 3.84E-16 | 1.31E-12   | 8.40E-14  | 7.61E-14 |
| GO:0048661~positive regulation of smooth muscle cell proliferation              | 20    | 4.26  | 1.44E-15 | 5.69E-12   | 2.98E-13  | 2.70E-13 |

|                                                        |    |       |          |          |          |          |
|--------------------------------------------------------|----|-------|----------|----------|----------|----------|
| GO:0043312~neutrophil degranulation                    | 47 | 10.00 | 1.56E-15 | 6.13E-12 | 3.07E-13 | 2.78E-13 |
| GO:0042493~response to drug                            | 36 | 7.66  | 2.66E-15 | 1.05E-11 | 4.79E-13 | 4.34E-13 |
| GO:0051607~defense response to virus                   | 32 | 6.81  | 2.68E-15 | 1.05E-11 | 4.79E-13 | 4.34E-13 |
| GO:0060333~interferon-gamma-mediated signaling pathway | 20 | 4.26  | 4.57E-15 | 1.79E-11 | 7.52E-13 | 6.81E-13 |
| GO:0008284~positive regulation of cell proliferation   | 49 | 10.43 | 4.58E-15 | 1.79E-11 | 7.52E-13 | 6.81E-13 |
| GO:0007165~signal transduction                         | 77 | 16.38 | 8.08E-15 | 3.19E-11 | 1.27E-12 | 1.15E-12 |

**Table S4.** DAVID Functional Annotation Chart (GOTERM\_BP\_DIRECT) computed for genes with a multiplicity of at least 5 in the 95 gene sets with high 5hmC/high mRNA levels identified in an integrative analysis of swine Obese- versus Lean-MSCs.

| Term                                                                                      | Count | %     | P-Value  | Bonferroni | Benjamini | FDR      |
|-------------------------------------------------------------------------------------------|-------|-------|----------|------------|-----------|----------|
| GO:0061621~canonical glycolysis                                                           | 17    | 7.26  | 7.81E-26 | 2.30E-22   | 2.30E-22  | 2.06E-22 |
| GO:0006954~inflammatory response                                                          | 41    | 17.52 | 3.42E-25 | 1.01E-21   | 5.05E-22  | 4.51E-22 |
| GO:0045944~positive regulation of transcription from RNA polymerase II promoter           | 63    | 26.92 | 2.00E-23 | 5.92E-20   | 1.97E-20  | 1.76E-20 |
| GO:0043066~negative regulation of apoptotic process                                       | 40    | 17.09 | 8.30E-20 | 2.45E-16   | 6.12E-17  | 5.47E-17 |
| GO:0019221~cytokine-mediated signaling pathway                                            | 32    | 13.68 | 3.06E-19 | 9.04E-16   | 1.81E-16  | 1.62E-16 |
| GO:0071222~cellular response to lipopolysaccharide                                        | 26    | 11.11 | 5.33E-19 | 1.57E-15   | 2.62E-16  | 2.34E-16 |
| GO:0045893~positive regulation of transcription, DNA-templated                            | 43    | 18.38 | 7.06E-19 | 2.08E-15   | 2.98E-16  | 2.66E-16 |
| GO:0008285~negative regulation of cell proliferation                                      | 36    | 15.38 | 1.83E-18 | 5.40E-15   | 6.43E-16  | 5.75E-16 |
| GO:0006915~apoptotic process                                                              | 40    | 17.09 | 1.96E-18 | 5.78E-15   | 6.43E-16  | 5.75E-16 |
| GO:0001666~response to hypoxia                                                            | 25    | 10.68 | 2.64E-18 | 7.78E-15   | 7.78E-16  | 6.96E-16 |
| GO:0060337~type I interferon signaling pathway                                            | 18    | 7.69  | 4.33E-18 | 1.28E-14   | 1.16E-15  | 1.04E-15 |
| GO:0006096~glycolytic process                                                             | 15    | 6.41  | 1.03E-17 | 3.05E-14   | 2.54E-15  | 2.27E-15 |
| GO:0042493~response to drug                                                               | 26    | 11.11 | 1.02E-14 | 3.02E-11   | 2.32E-12  | 2.07E-12 |
| GO:0010628~positive regulation of gene expression                                         | 33    | 14.10 | 2.69E-14 | 7.93E-11   | 5.67E-12  | 5.07E-12 |
| GO:1902895~positive regulation of pri-miRNA transcription from RNA polymerase II promoter | 13    | 5.56  | 1.90E-13 | 5.60E-10   | 3.72E-11  | 3.33E-11 |
| GO:0035994~response to muscle stretch                                                     | 10    | 4.27  | 2.02E-13 | 5.96E-10   | 3.72E-11  | 3.33E-11 |
| GO:0008284~positive regulation of cell proliferation                                      | 32    | 13.68 | 4.74E-13 | 1.40E-09   | 8.24E-11  | 7.36E-11 |
| GO:0043312~neutrophil degranulation                                                       | 30    | 12.82 | 1.03E-12 | 3.04E-09   | 1.63E-10  | 1.45E-10 |
| GO:0000187~activation of MAPK activity                                                    | 17    | 7.26  | 1.05E-12 | 3.09E-09   | 1.63E-10  | 1.45E-10 |



|                                                                                            |    |      |          |          |          |          |
|--------------------------------------------------------------------------------------------|----|------|----------|----------|----------|----------|
| GO:0010832~negative regulation of myotube differentiation                                  | 9  | 3.85 | 2.35E-12 | 6.93E-09 | 3.46E-10 | 3.10E-10 |
| GO:0030335~positive regulation of cell migration                                           | 22 | 9.40 | 6.05E-12 | 1.79E-08 | 8.51E-10 | 7.61E-10 |
| GO:0009615~response to virus                                                               | 16 | 6.84 | 7.50E-12 | 2.21E-08 | 1.01E-09 | 8.99E-10 |
| GO:1903800~positive regulation of production of miRNAs involved in gene silencing by miRNA | 8  | 3.42 | 2.52E-11 | 7.45E-08 | 3.24E-09 | 2.90E-09 |
| GO:0051607~defense response to virus                                                       | 20 | 8.55 | 2.67E-11 | 7.89E-08 | 3.29E-09 | 2.94E-09 |
| GO:0001934~positive regulation of protein phosphorylation                                  | 19 | 8.12 | 5.93E-11 | 1.75E-07 | 7.01E-09 | 6.26E-09 |

**Table S5.** DAVID Functional Annotation Chart (GOTERM\_BP\_DIRECT) computed for genes with a multiplicity of at least 6 in the 95 gene sets with high 5hmC/high mRNA levels identified in an integrative analysis of swine Obese- versus Lean-MSCs.

| Term                                                                                      | Count | %     | P-Value  | Bonferroni | Benjamini | FDR      |
|-------------------------------------------------------------------------------------------|-------|-------|----------|------------|-----------|----------|
| GO:0019221~cytokine-mediated signaling pathway                                            | 26    | 19.85 | 1.08E-19 | 2.36E-16   | 9.66E-17  | 8.69E-17 |
| GO:0043066~negative regulation of apoptotic process                                       | 31    | 23.66 | 1.32E-19 | 2.89E-16   | 9.66E-17  | 8.69E-17 |
| GO:0006954~inflammatory response                                                          | 28    | 21.37 | 1.32E-19 | 2.90E-16   | 9.66E-17  | 8.69E-17 |
| GO:0071222~cellular response to lipopolysaccharide                                        | 21    | 16.03 | 1.57E-18 | 3.45E-15   | 8.63E-16  | 7.76E-16 |
| GO:0045944~positive regulation of transcription from RNA polymerase II promoter           | 40    | 30.53 | 3.49E-17 | 7.66E-14   | 1.53E-14  | 1.38E-14 |
| GO:0008285~negative regulation of cell proliferation                                      | 26    | 19.85 | 3.98E-16 | 9.74E-13   | 1.46E-13  | 1.31E-13 |
| GO:0001666~response to hypoxia                                                            | 17    | 12.98 | 9.22E-14 | 2.02E-10   | 2.89E-11  | 2.60E-11 |
| GO:0035994~response to muscle stretch                                                     | 9     | 6.87  | 1.38E-13 | 3.03E-10   | 3.79E-11  | 3.41E-11 |
| GO:0030335~positive regulation of cell migration                                          | 18    | 13.74 | 1.67E-12 | 3.67E-09   | 4.07E-10  | 3.66E-10 |
| GO:0061621~canonical glycolysis                                                           | 9     | 6.87  | 2.24E-12 | 4.92E-09   | 4.48E-10  | 4.03E-10 |
| GO:0045893~positive regulation of transcription, DNA-templated                            | 26    | 19.85 | 2.25E-12 | 4.93E-09   | 4.48E-10  | 4.03E-10 |
| GO:0060337~type I interferon signaling pathway                                            | 11    | 8.40  | 3.21E-11 | 7.04E-08   | 5.87E-09  | 5.28E-09 |
| GO:0006915~apoptotic process                                                              | 23    | 17.56 | 5.03E-11 | 1.10E-07   | 8.48E-09  | 7.63E-09 |
| GO:0042493~response to drug                                                               | 17    | 12.98 | 9.16E-11 | 2.01E-07   | 1.44E-08  | 1.29E-08 |
| GO:0000187~activation of MAPK activity                                                    | 12    | 9.16  | 4.68E-10 | 1.03E-06   | 6.84E-08  | 6.15E-08 |
| GO:0008284~positive regulation of cell proliferation                                      | 21    | 16.03 | 5.09E-10 | 1.12E-06   | 6.98E-08  | 6.28E-08 |
| GO:1902895~positive regulation of pri-miRNA transcription from RNA polymerase II promoter | 9     | 6.87  | 7.04E-10 | 1.54E-06   | 9.07E-08  | 8.15E-08 |
| GO:0048661~positive regulation of smooth muscle cell proliferation                        | 10    | 7.63  | 7.44E-10 | 1.63E-06   | 9.07E-08  | 8.15E-08 |
| GO:0010628~positive regulation of gene expression                                         | 20    | 15.27 | 1.74E-09 | 3.82E-06   | 2.01E-07  | 1.81E-07 |

|                                                          |    |       |          |          |          |          |
|----------------------------------------------------------|----|-------|----------|----------|----------|----------|
| GO:0071356~cellular response to tumor necrosis factor    | 12 | 9.16  | 2.88E-09 | 6.32E-06 | 3.16E-07 | 2.84E-07 |
| GO:0051607~defense response to virus                     | 14 | 10.69 | 3.37E-09 | 7.39E-06 | 3.52E-07 | 3.17E-07 |
| GO:0071260~cellular response to mechanical stimulus      | 10 | 7.63  | 4.56E-09 | 1.00E-05 | 4.36E-07 | 3.92E-07 |
| GO:0031663~lipopolysaccharide-mediated signaling pathway | 8  | 6.11  | 4.57E-09 | 1.00E-05 | 4.36E-07 | 3.92E-07 |
| GO:0009615~response to virus                             | 11 | 8.40  | 4.98E-09 | 1.09E-05 | 4.55E-07 | 4.09E-07 |
| GO:0006096~glycolytic process                            | 8  | 6.11  | 6.75E-09 | 1.48E-05 | 5.93E-07 | 5.33E-07 |

**Table S6.** DAVID Functional Annotation Chart (GOTERM\_BP\_DIRECT) computed for genes from 7 gene sets with low 5hmC/low mRNA levels identified in an integrative analysis of swine Obese- versus Lean-MSCs.‡

| Term                                                                                                                         | Count | %    | P-Value  | Bonferroni | Benjamini | FDR      |
|------------------------------------------------------------------------------------------------------------------------------|-------|------|----------|------------|-----------|----------|
| GO:0045494~photoreceptor cell maintenance                                                                                    | 44    | 8.19 | 2.61E-66 | 8.09E-63   | 8.09E-63  | 7.92E-63 |
| GO:0001916~positive regulation of T cell mediated cytotoxicity                                                               | 25    | 4.66 | 2.64E-36 | 8.18E-33   | 4.09E-33  | 4.00E-33 |
| GO:0045954~positive regulation of natural killer cell mediated cytotoxicity                                                  | 24    | 4.47 | 8.12E-34 | 2.52E-30   | 8.39E-31  | 8.20E-31 |
| GO:0032729~positive regulation of interferon-gamma production                                                                | 18    | 3.35 | 2.13E-11 | 6.60E-08   | 1.65E-08  | 1.61E-08 |
| GO:0050776~regulation of immune response                                                                                     | 25    | 4.66 | 3.15E-09 | 9.75E-06   | 1.95E-06  | 1.91E-06 |
| GO:0002486~antigen processing and presentation of endogenous peptide antigen via MHC class I via ER pathway, TAP-independent | 7     | 1.30 | 9.03E-09 | 2.80E-05   | 4.67E-06  | 4.56E-06 |
| GO:0007268~chemical synaptic transmission                                                                                    | 27    | 5.03 | 1.47E-08 | 4.56E-05   | 6.51E-06  | 6.37E-06 |
| GO:0002480~antigen processing and presentation of exogenous peptide antigen via MHC class I, TAP-independent                 | 7     | 1.30 | 2.65E-08 | 8.21E-05   | 9.12E-06  | 8.92E-06 |
| GO:0050953~sensory perception of light stimulus                                                                              | 7     | 1.30 | 2.65E-08 | 8.21E-05   | 9.12E-06  | 8.92E-06 |
| GO:0007601~visual perception                                                                                                 | 23    | 4.28 | 3.21E-08 | 9.96E-05   | 9.96E-06  | 9.74E-06 |

‡Salient Gene Ontology (GO) terms with functions related to leukocyte-mediated cytotoxicity are highlighted.

**Table S7.** Laboratory measures and demographic data of Lean and Obese patients ( $n = 5$ , each).

|                                      | <b>Lean</b>       | <b>Obese</b>      |
|--------------------------------------|-------------------|-------------------|
| <b>Demographics:</b>                 |                   |                   |
| Age (years)                          | 60.4 $\pm$ 7.2    | 56.6 $\pm$ 9.5    |
| Sex (Male/Female)                    | 2/3               | 2/3               |
| Body Mass Index (kg/m <sup>2</sup> ) | 24.8 (24.3-26.8)  | 45.9 (39.4-48.3)* |
| <b>Relevant laboratory measures:</b> |                   |                   |
| Mean blood pressure (mmHg)           | 82.4 $\pm$ 12.6   | 91.5 $\pm$ 7.9    |
| Total cholesterol (mg/dL)            | 198.3 $\pm$ 25.4  | 209.5 $\pm$ 7.8   |
| Triglycerides (mg/dL)                | 73.6 $\pm$ 8.3    | 111.5 $\pm$ 10.6* |
| LDL (mg/dL)                          | 128.3 $\pm$ 8.7   | 125.5 $\pm$ 4.9   |
| Fasting glucose (mg/dL)              | 92.0 (83.0-118.5) | 96.0 (89.0-137.5) |

*LDL: low-density lipoprotein. Data displayed as mean  $\pm$  standard deviation, or median (interquartile range). \*  $p \leq 0.05$  vs. Lean.*
