# Supplementary material for: Obesity and dyslipidemia are associated with partially reversible modifications to DNA hydroxymethylation of apoptosis- and senescence-related genes in swine adipose-derived mesenchymal stem/stromal cells
Source: PubMed Central journal article supplement (PMC10214739; doi:10.1186/s13287-023-03372-x), 2023-05-25

Fig. S4

Swine MSCs

A

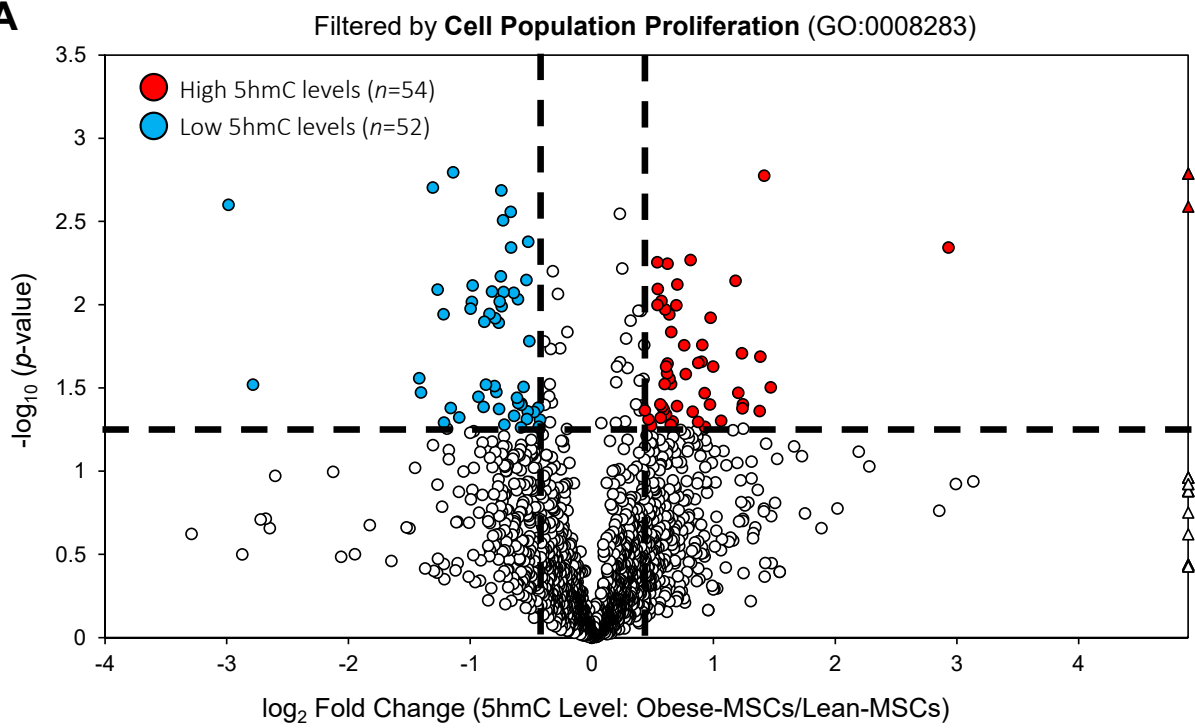

○ Lean-MSCs  
■ Obese-MSCs

B

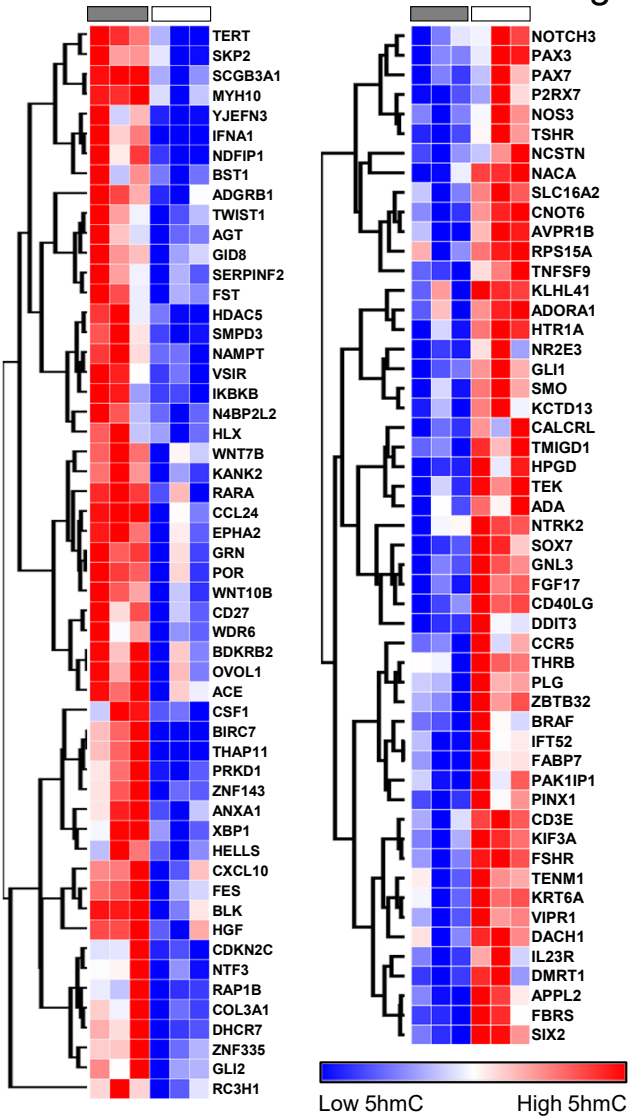

Supplement: 13287_2023_3372_MOESM5_ESM.pdf [file 13287_2023_3372_MOESM5_ESM.pdf]
