# Supplementary material for: Obesity and dyslipidemia are associated with partially reversible modifications to DNA hydroxymethylation of apoptosis- and senescence-related genes in swine adipose-derived mesenchymal stem/stromal cells
Source: PubMed Central journal article supplement (PMC10214739; doi:10.1186/s13287-023-03372-x), 2023-05-25
Supplement: 13287_2023_3372_MOESM7_ESM.pdf [file 13287_2023_3372_MOESM7_ESM.pdf]

**A**

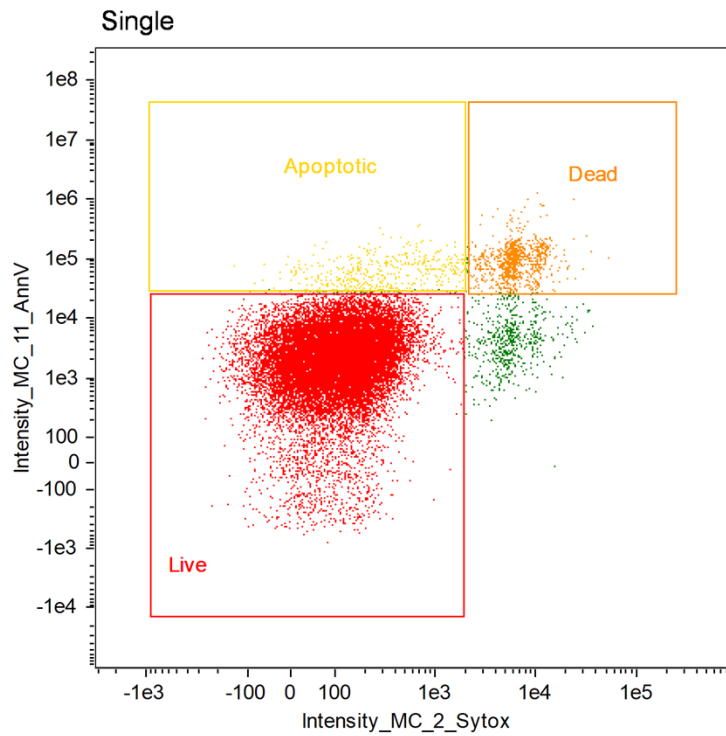

Intensity\_MC\_2\_Sytox, Intensity\_MC\_11\_AnnV

| Population                   | Count | %Gated |
|------------------------------|-------|--------|
| Single & Focused             | 23139 | 100    |
| Live & Single & Focused      | 21124 | 91.3   |
| Apoptotic & Single & Focused | 422   | 1.82   |
| Dead & Single & Focused      | 972   | 4.2    |

**B**

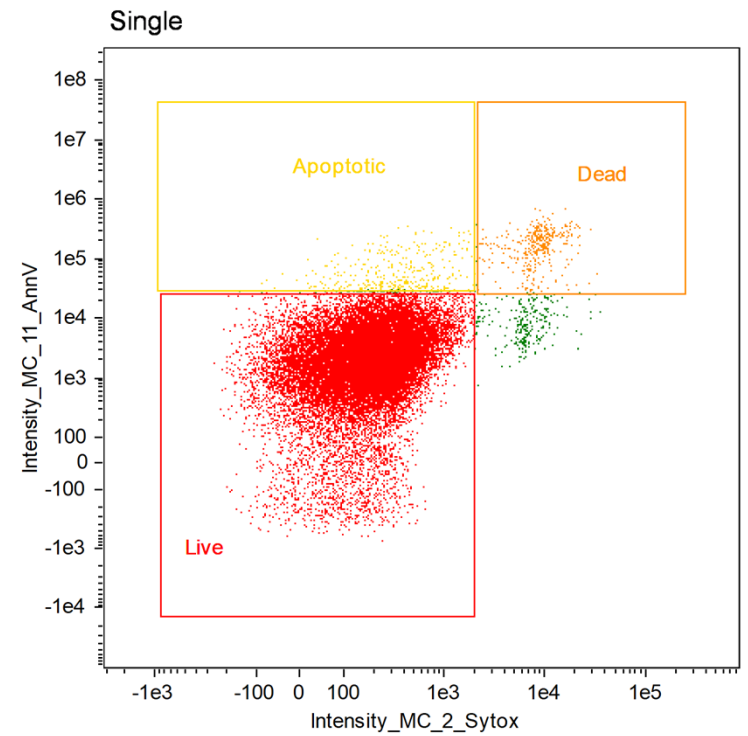

Intensity\_MC\_2\_Sytox, Intensity\_MC\_11\_AnnV

| Population                   | Count | %Gated |
|------------------------------|-------|--------|
| Single & Focused             | 23328 | 100    |
| Live & Single & Focused      | 22296 | 95.6   |
| Apoptotic & Single & Focused | 332   | 1.42   |
| Dead & Single & Focused      | 358   | 1.53   |
