# Supplementary material for: Obesity and dyslipidemia are associated with partially reversible modifications to DNA hydroxymethylation of apoptosis- and senescence-related genes in swine adipose-derived mesenchymal stem/stromal cells
Source: PubMed Central journal article supplement (PMC10214739; doi:10.1186/s13287-023-03372-x), 2023-05-25

Human MSCs

**A**

Filtered by **Apoptotic Process** (GO:0006915)

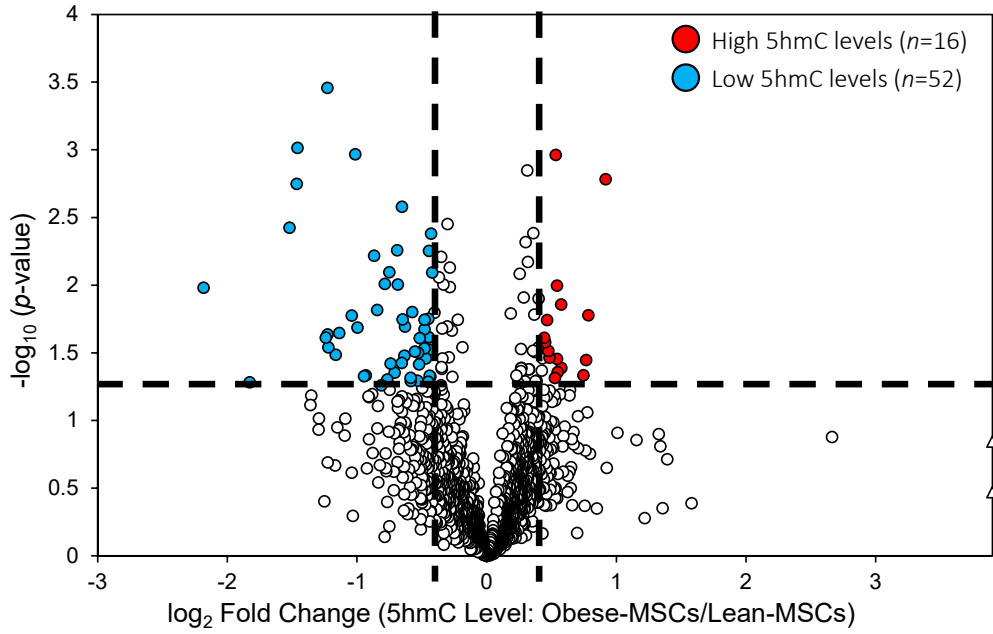

**B**

Filtered by **Cellular Senescence**  
 [REACTOME SuperPath + (GO:0090398)]

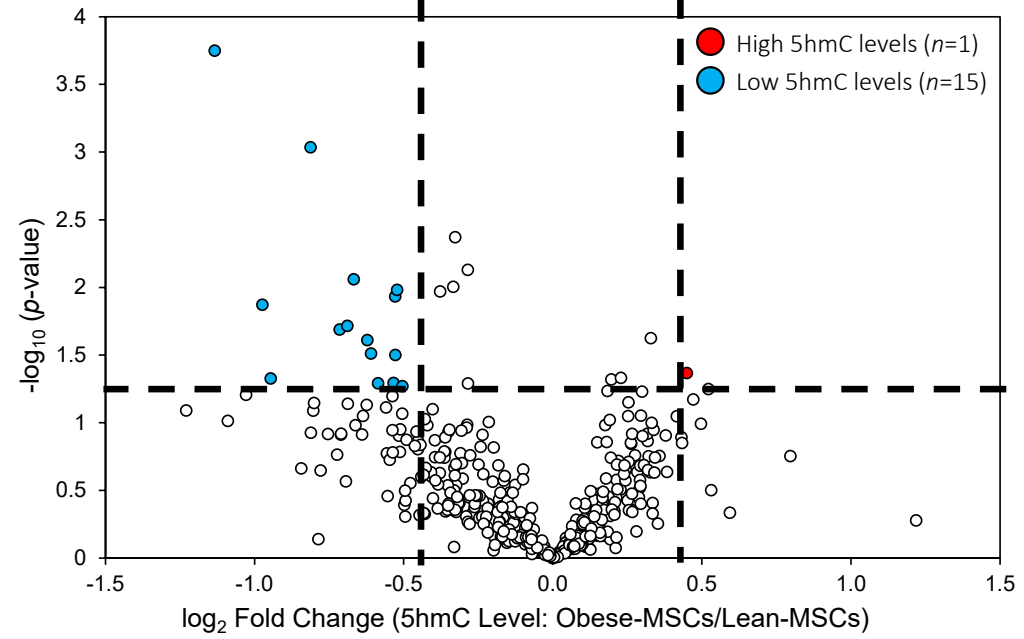

Supplement: 13287_2023_3372_MOESM11_ESM.pdf [file 13287_2023_3372_MOESM11_ESM.pdf]
